# Supplementary material for: NanoBRET-based detection of ligand–receptor interactions at the neuropeptide FF receptor 1
Source: Royal Society of Chemistry journal article supplement (doi:10.1039/d6ra01350c), 2026-05-20
Supplement: d6ra01350c1.pdf [file d6ra01350c1.pdf]

## Supporting Information

# NanoBRET-based detection of ligand-receptor interactions at the neuropeptide FF receptor 1

Hannah Lentschat <sup>a</sup>, Annette G. Beck-Sickinger <sup>a</sup>

<sup>a</sup>Leipzig University, Faculty of life sciences, Institute of biochemistry, Bruederstr. 34, 04103 Leipzig

**Table S1: Analytics of the synthesized peptides.** Experimental mass ( $M_{\text{exp}}$ ) was compared to the corresponding calculated monoisotopic mass ( $M_{\text{mono}}$ ). Purity of  $\geq 95\%$  was confirmed using reversed phase-high performance liquid chromatography on (a) Aeris Peptide XB-C18, 100 Å, 3.6  $\mu\text{m}$ , 250 x 4,6mm (Phenomenex) and (b) Jupiter Proteo C12, 90 Å, 4  $\mu\text{m}$ , 250 x 4,6mm (Phenomenex) and gradients of eluent B in A from (\*) 10% to 60%, (\*\*) 20% to 70% or (\*\*\*) 30% to 80% in 40 min. All spectra and chromatograms can be accessed at Opara (<https://doi.org/10.25532/OPARA-1092>) Abbreviations: Ahx: 6-amino-hexanoic acid; NPFF: neuropeptide FF; NPVF: neuropeptide VF; Tam: 6-carboxytetramethylrhodamine; TTDS: 1,13-diamino-4,7,10-trioxatridecan-succinamic acid.

| peptide                             | $M_{\text{mono}}$ [Da] | $M_{\text{exp}}$ [M+H] <sup>+</sup> | $t_{\text{R}}^{(a)}$ [min] | $t_{\text{R}}^{(b)}$ [min] | purity [%] |
|-------------------------------------|------------------------|-------------------------------------|----------------------------|----------------------------|------------|
| NPVF (xn10)                         | 968.56                 | 969.54                              | 9.9 <sup>(*)</sup>         | 13.8 <sup>(*)</sup>        | > 95       |
| Tam-NPVF (xw10.1)                   | 1380.70                | 1381.67                             | 12.1 <sup>(**)</sup>       | 16.1 <sup>(**)</sup>       | > 97       |
| Tam-Ahx <sub>2</sub> -NPVF (xw10.2) | 1606.87                | 1607.92                             | 11.7 <sup>(**)</sup>       | 16.2 <sup>(**)</sup>       | > 98       |
| Tam-TTDS-NPVF (yd1)                 | 1682.89                | 1683.95                             | 19.4 <sup>(*)</sup>        | 12.4 <sup>(***)</sup>      | > 95       |
| NPFF (vk8+9)                        | 1080.59                | 1081.59                             | 15.5 <sup>(*)</sup>        | 19.1 <sup>(*)</sup>        | > 98       |
| Tam-NPFF (xw11.1)                   | 1492.73                | 1493.80                             | 15.7 <sup>(**)</sup>       | 19.7 <sup>(**)</sup>       | > 97       |
| Tam-Ahx <sub>2</sub> -NPFF (xw11.2) | 1718.90                | 1719.90                             | 16.3 <sup>(**)</sup>       | 20.4 <sup>(**)</sup>       | > 98       |
| K(Tam)-NPFF (zw3.2)                 | 1620.82                | 1621.78                             | 12.1 <sup>(**)</sup>       | 19.3 <sup>(**)</sup>       | > 98       |
| SQA-NPFF (zw2)                      | 1366.71                | 1367.61                             | 8.2 <sup>(**)</sup>        | 15.8 <sup>(**)</sup>       | > 98       |
| K(Tam)-SQA-NPFF (zw2.2)             | 1906.95                | 1907.80                             | 10.8 <sup>(**)</sup>       | 17.9 <sup>(**)</sup>       | > 96       |

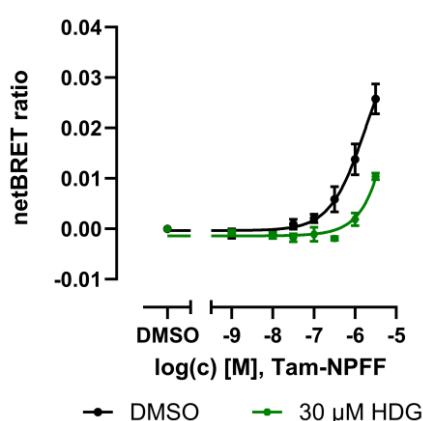

**Figure S 1: Tam-NPFF at the  $\Delta 1$ -20-Nluc-NPFFR1 can be displaced with the selective antagonist hederagenin (HDG), excluding non-specific binding as cause for increase in netBRET ratio.** BRET assays were performed in HEK293 cells transiently transfected with the  $\Delta 1$ -20-Nluc-NPFFR1-eYFP, data represent mean  $\pm$  SEM of the netBRET ratio from n=3 experiments.

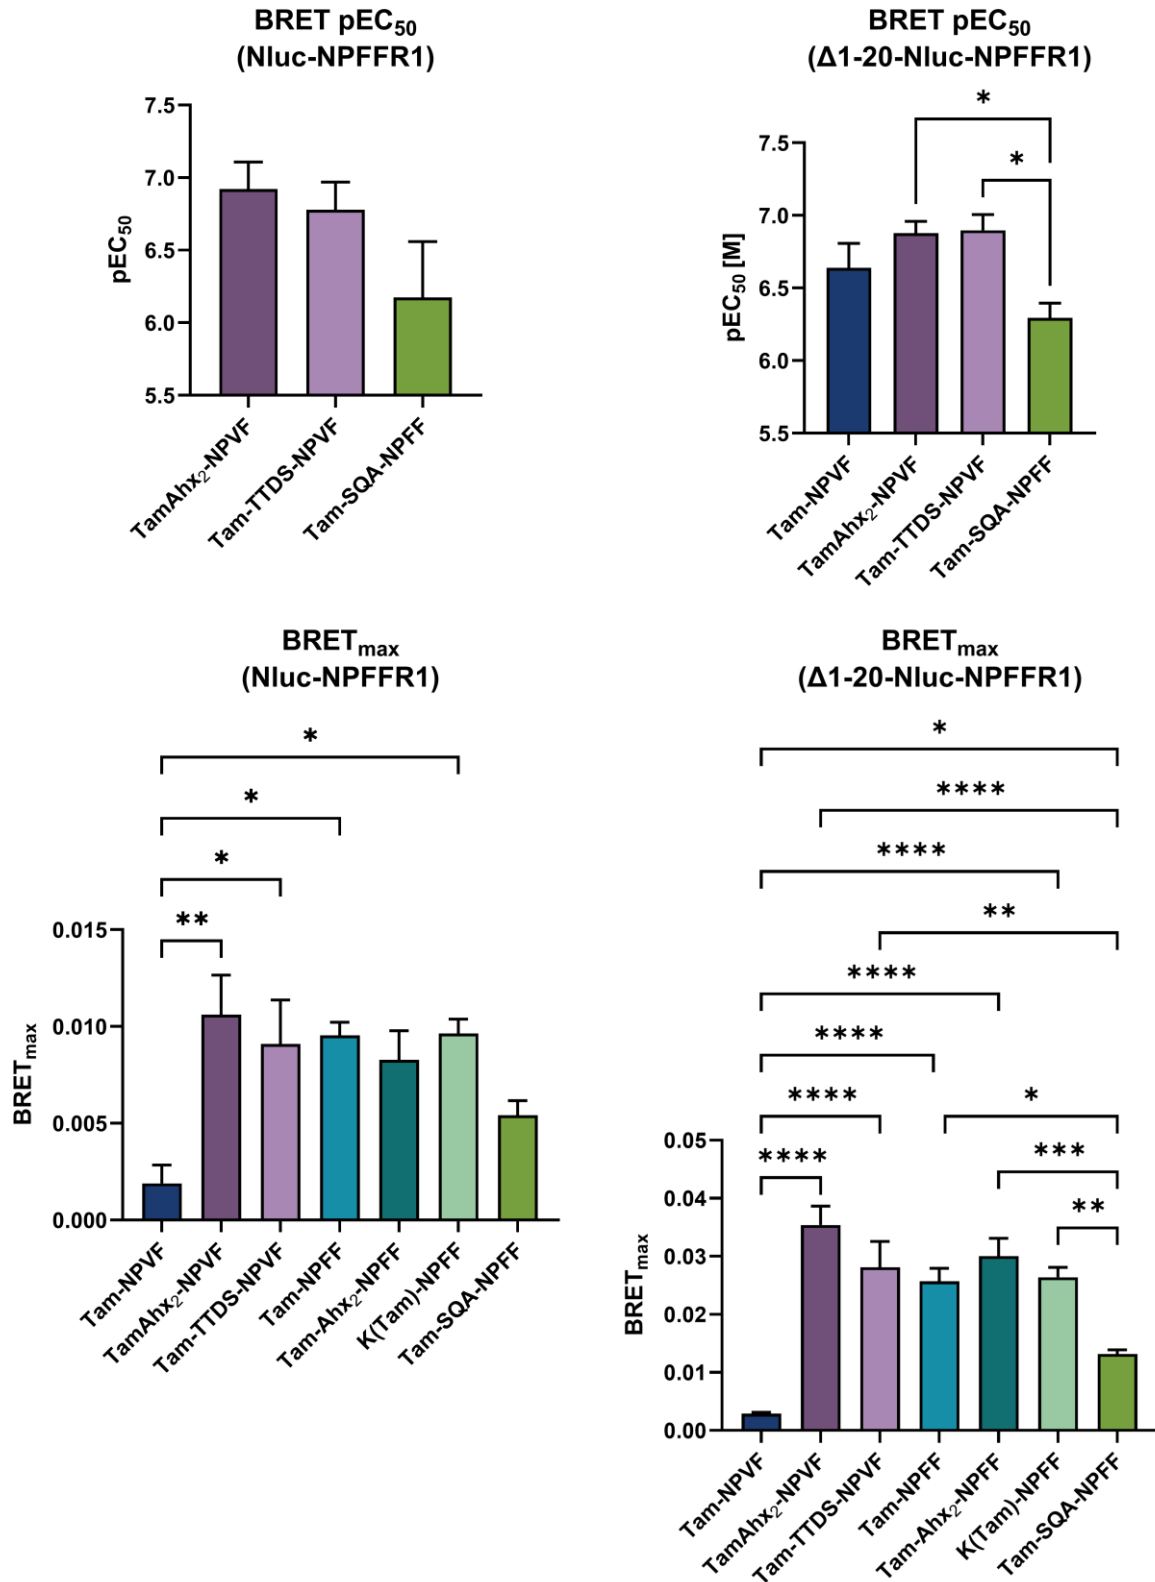

**Figure S 2: Statistical analysis of pEC<sub>50</sub> and BRET<sub>max</sub> values of the peptides at the Nluc-tagged full-length and truncated receptor.** One-way ANOVA with multiple comparisons (Tukey) was performed. \*, P<0.05; \*\*, P<0.01; \*\*\*, P<0.001; and \*\*\*\*, P<0.0001.

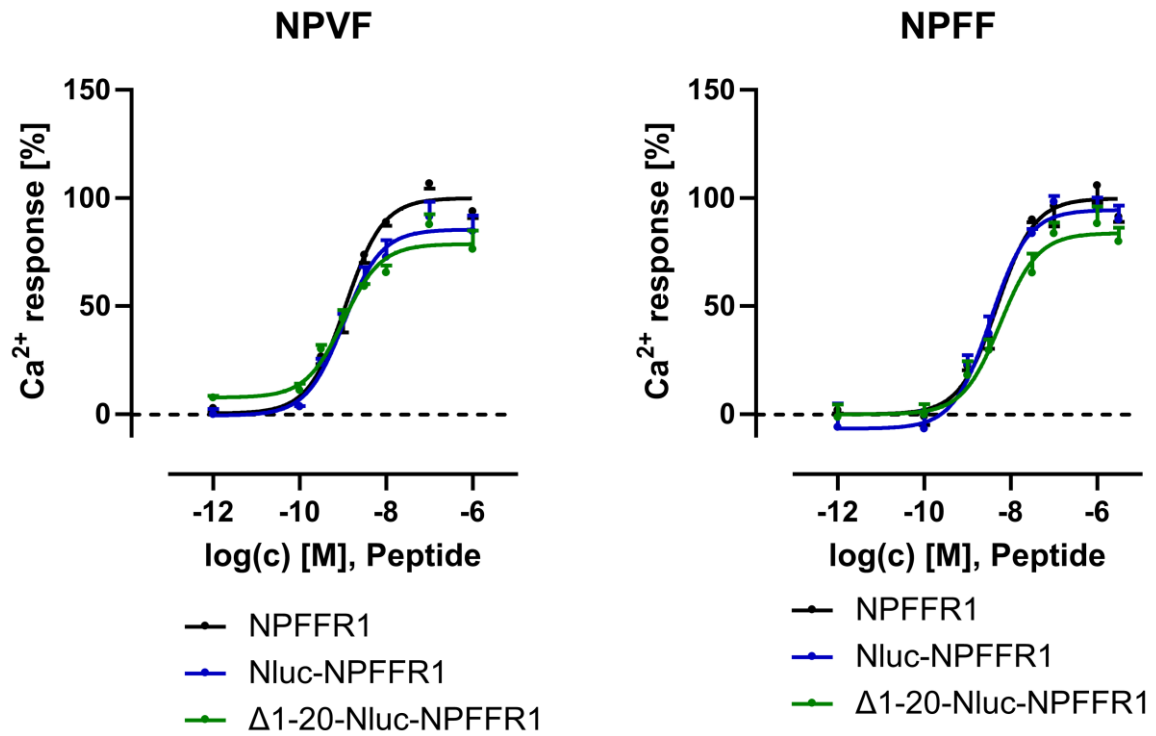

**Figure S 3: Activity of NPVF and NPFF at the Nluc-labeled full-length and truncated NPFFR1 compared to the wildtype receptor.** Ca<sup>2+</sup> assays were performed in HEK293 cells transiently transfected with the NPFFR1, Nluc-NPFFR1 or Δ1-20-Nluc-NPFFR1 and the chimeric G protein Δ6Gα<sub>qi4myr</sub>. Data represent mean ± SEM from n=3 experiments.
